# Supplementary material for: Home-field advantage? evidence of local adaptation among plants, soil, and arbuscular mycorrhizal fungi through meta-analysis
Source: Springer Nature journal article supplement (doi:10.1186/s12862-016-0698-9), 2016-06-10
Supplement: 12862_2016_698_MOESM1_ESM.pdf [file 12862_2016_698_MOESM1_ESM.pdf]

**Table S2.** Summary of the candidate predictor variables that were included in the analysis for each data subset. An ‘X’ indicates an inclusion of a candidate predictor variable in the analyses of a particular data subset. The variables STERILITY and MICROBIAL AMENDMENT were only used if all studies were laboratory experiments.

| <b>Explanatory Variable</b> | <b>Fungi Only</b> | <b>Single Species inocula only</b> | <b>Lab Studies Only</b> | <b>Within-Paper: Plant-Fungal</b> | <b>Within-Paper: Fungal-Soil</b> | <b>Within-Paper: Plant-Soil</b> |
|-----------------------------|-------------------|------------------------------------|-------------------------|-----------------------------------|----------------------------------|---------------------------------|
| Plant Functional Group      | X                 | X                                  | X                       | X                                 | X                                | X                               |
| Inoculum Complexity         | X                 | ---                                | X                       | X                                 | X                                | ---                             |
| Sterility                   | ---               | ---                                | X                       | ---                               | ---                              | ---                             |
| Microbial Amendment         | ---               | ---                                | X                       | X                                 | X                                | ---                             |
| Experimental Set-Up         | X                 | X                                  | ---                     | ---                               | ---                              | ---                             |
| N Fertilization             | X                 | X                                  | X                       | X                                 | X                                | X                               |
| P Fertilization             | X                 | X                                  | X                       | ---                               | X                                | ---                             |
| Origin                      | X                 | X                                  | X                       | ---                               | ---                              | ---                             |
